# Supplementary material for: Effect of hypoglycemic events on cognitive function in individuals with type 2 diabetes mellitus: a dose–response meta-analysis
Source: Front Neurol. 2024 Aug 13;15:1394499. doi: 10.3389/fneur.2024.1394499 (PMC11347434; doi:10.3389/fneur.2024.1394499)
Supplement: SUPPLEMENTARY MATERIAL 4 — Forest plot of the 14 trials. [file Table_2.xlsx]

## Sheet: Sheet1
Characteristics of included studies
Author	Year	Country	Types of researches	Sample size(n)	Length of follow-up(years)	Mean age(years)	Types of diabetes	Measurement of hypoglycemia	No.of hypoglycemias	Measurement of cognitive dysfunction	OR/RR/HR(95%CI)	Adjustment for potential confounders
Wajd Alkabbani et al	2023	Canada	Retrospective cohort study	239937	22	Midlife cohort 45-64 Late-life cohort 65-84	T2DM	Hospital records	≥1	ICD-9-CM	Midlife cohort 2.85（1.72-4.72） Late-life cohort 2.38（1.83-3.11）	1)demo-graphic variables; 2)diabetes duration; 3)proxies for diabetes severity;4)other morbidities; 5)other prescription drug use; 6) index calendar year to account for any time trends.
Chung-Yi Li et al	2022	Taiwan,China	Prospective cohort study	677618	9	Severe hypoglycemia 61.76±11.93 No severe hypoglycemia 58.05±11.98	T2DM	ICD-9-CM	≥1	ICD-9-CM	1.25（1.02-1.54）	Gender, age, urbanization level, income-based insurance premium, annual ambulatory visits, township family-income tertiles, and comorbidities (cerebrovascular disease, cardiovascular disease, hypertension, hyperlipidemia, microvascular disease, peripheral neuropathy, depression, head trauma, and end-stage renal disease).
Eugene Han et al	2022	Korea	Prospective cohort study	2032689	9	Severe hypoglycemia 67.4±10.1 No severe hypoglycemia 59.8±10.6	T2DM	ICD-10-CM	1 ≥2	ICD-10-CM	group(1) 1.54（1.48-1.60） group(2) 1.80（1.66-1.94）	Age, gender, smoking history, drinking history, body mass index, insulin use history, disease duration,etc
Zhang Jie et al	2021	China	Case-control study	610	NA	66.23±2.43	T2DM	Guidelines	≤3 3-7 ≥8	MOCA	1.321（1.235-2.828）	Unclear
YoungGun Kim et al	2020	Korea	Retrospective cohort study	11932	4.4	Hypoglycemia 75.82±5.41 No hypoglycemia 75.82±5.34	T2DM	ICD-10-CM	1 2-3 ＞3	ICD-10-CM	group(1) 1.170（1.043-1.313） group(2) 1.201（1.016-1.421） group(3) 1.358（1.060-1.740）	1)demo-graphic variables; 2)other diseases that may affect cognitive function;3)diabetes-related complications;4)other morbidities; 5)medicine use; 6)alcohol use,etc.
Hou Xinghua et al	2019	China	Case-control study	428	NA	72.41±9.73	T2DM	Questionnaires and scales	≥1	MMSE	1.951（1.159-3.171）	Unclear
Mao Hongling et al	2019	China	Case-control study	310	NA	≥65	T2DM	Questionnaires and scales	≥1	MMSE	3.297（1.505-7.221）	Unclear
Shuling Liu et al	2019	China	Case-control study	1848	NA	63.65±9.26	T2DM	Questionnaires and scales	≥1	MMSE、MOCA	2.718（1.024-7.210）	Age, gender,and educational level.
Tali Cukierman-Yaffe et al	2019	40 countries	Prospective cohort study	11495	6.2	Severe hypoglycemia 65.5±8.1 No severe hypoglycemia 63.2±7.7	T2DM	Hospital records	≥1	MMSE	1.0(0.76-1.31)	1)baseline previous cardiovascular disease; 2)diabetes status; 3)treatment allocation.
Hemalkumar B et al	2017	England	Retrospective cohort study	53055	9	Hypoglycemia 75.5±6.5 No hypoglycemia 75.9±6.6	T2DM	Hospital records	≥1 1 ≥2	Diagnosis codes of the Clinical Practice Research Datalink	group(1) 1.27（1.06-1.51） group(2) 1.26（1.03-1.54） group(3) 1.50（1.09-2.08）	1)demographic variables such as age and gender; 2)baseline HbA1c to reflect the severity of diabetes; 3)alcohol use, smoking status, diabetes treatment; 4)the fourteen comorbidities that were associated with dementia.
Liu Chang et al	2016	China	Case-control study	90	NA	50.56±16.43	T2DM	Questionnaires and scales	≥5	MMSE	3.78(0.91-18.66)	Unclear
Sang Ouk Chin et al	2016	Korea	Prospective cohort study	4540	8	67.5±5.5	T2DM	ICD-10-CM	1 ≥2	ICD-10-CM	group(1) 2.689（1.080-6.694） group(2) 4.065（1.099-15.039）	1)alcohol use, smoking status, diabetes treatment, and the fourteen comorbidities that were associated with dementia; 2)previous medical history; 3)baseline medications, Tchol,and LDL-C; 4)mean HbA1c and medications during the follow-up period.
Nisha Nigil Haroon et al	2015	Canada	Prospective cohort study	893115	17	73（69-78）	T2DM	ICD-9-CM	≥1	ICD-9-CM	1.73（1.62-1.84）	age, sex, income, ethnic-ity, recent immigration (10 years since landing),baseline CAD, CVD, PVD, HTN, or CKD, and hospitalizations or ED visits for hypoglycemia during follow-up
Insa Feinkohl et al	2014	England	Prospective cohort study	831	4	67.69±4.16	T2DM	Questionnaires and scales	≥1	MMSE	2.04（1.25-3.31）	Age, gender
C-H Lin et al	2013	Taiwan,China	Retrospective cohort study	15404	7	64.2±9.9	T2DM	ICD-9-CM	≥1 1 2 ≥3	ICD-9-CM	group(1) 1.45（1.07-1.95） group(2) 1.47（1.04-2.07） group(3) 1.41（0.73-2.71） group(4) 2.60（0.97-6.92）	Demographic characteristics and comorbidities
Kristine Yaffe et al	2013	America	Prospective cohort study	783	12	Hypoglycemia 74.6±2.7 No hypoglycemia 74.0±2.8	T2DM	ICD-9-CM	≥1	ICD-9-CM	2.1（1.0-4.4）	age, sex, education, in-sulin use, race/ethnicity, prevalent DM, APOE ε4 status, base-line 3MS score, and glycated hemoglobin level
Rachel A.Whitmer et al	2009	America	Retrospective cohort study	16667	27	Hypoglycemia 66.32±7.54 No hypoglycemia 64.78±7.00	T2DM	ICD-9-CM	≥1 1 2 ≥3	ICD-9-CM	group(1) 1.44（1.25-1.66） group(2) 1.26（1.10-1.49） group(3) 1.80（1.37-2.36） group(4) 1.94（1.42-2.64）	age, sex, race/ethnicity, education, body mass in-dex, duration of diabetes,7-year mean glycated hemoglobin, diabetes treatment, du-ration of insulin use, hyperlipidemia, hypertension, cardiovascular disease, stroke, transient cerebral ischemia, and end-stage renal disease.
Abbreviations:NA,not applicaple; T2DM,type 2 diabetes mellitus; MOCA，Montreal cognitive assessment；MMSE，Mini-mental state examination；ICD-10-CM,International Classification of Diseases, 10th Revision, clinical modification; ICD-9-CM, International Classification of Diseases, 9th Revision, clinical modification; RR, risk ratio; OR, odds ratio; HR,hazard ratio; CI, confidence intervals.
